# Supplementary material for: Identification of influencers through the wisdom of crowds
Source: PLOS journal article supplement (doi:10.1371/journal.pone.0200109), 2018-07-16
Supplement: S22 (10.1371/journal.pone.0200109.s022) [file journal.pone.0200109.s022]

**Proof:**  $\mathcal{I}(i) \in [0, 1], \forall i$

**Proposition 1** *For any vector with elements in the unit interval, the mean is always greater than or equal to the variance.*

**Proof 1** *Let  $\mathbf{X} = \{x_1, \dots, x_n\}$  be a vector with:  $x_k \in [0, 1], \forall k = 1, \dots, n$ .*

*If the mean  $\langle \mathbf{X} \rangle$  is greater than or equal to the variance  $\langle \mathbf{X}^2 \rangle - \langle \mathbf{X} \rangle^2$  it follows that:*

$$\langle \mathbf{X} \rangle + \langle \mathbf{X} \rangle^2 \geq \langle \mathbf{X}^2 \rangle$$

*The inequality always holds as all  $x$  values are in the unit interval ( $x_k \in [0, 1]$ ) and thus the square is always greater than or equal to the original value ( $x_k \geq x_k^2, \forall k = 1, \dots, n$ ).*
